# Supplementary material
Source: PubMed Central journal article supplement (PMC7059016)
Supplement: NIHMS1549063-supplement-Supplemental_Material.pdf [file NIHMS1549063-supplement-Supplemental_Material.pdf]

# Somatic *CACNA1H* mutation as a cause of aldosterone-producing adenoma

## Online-only Data Supplement

Kazutaka Nanba<sup>1,2</sup>, Amy R. Blinder<sup>1</sup>, Juilee Rege<sup>1</sup>, Namita G. Hattangady<sup>3#</sup>, Tobias Else<sup>3</sup>, Chia-Jen Liu<sup>4,5,6</sup>, Scott A. Tomlins<sup>4,5,6</sup>, Pankaj Vats<sup>4,6</sup>, Chandan Kumar-Sinha<sup>4,6</sup>, Thomas J. Giordano<sup>3,4,5</sup>, William E. Rainey<sup>1,3\*</sup>

<sup>1</sup>Department of Molecular and Integrative Physiology, University of Michigan, Ann Arbor, Michigan, USA

<sup>2</sup>Department of Endocrinology and Metabolism, National Hospital Organization Kyoto Medical Center, Kyoto, Japan

<sup>3</sup>Division of Metabolism, Endocrine, and Diabetes, Department of Internal Medicine, University of Michigan, Ann Arbor, Michigan, USA

<sup>4</sup>Department of Pathology, University of Michigan, Ann Arbor, Michigan, USA

<sup>5</sup>Rogel Cancer Center, University of Michigan, Ann Arbor, Michigan, USA

<sup>6</sup>Michigan Center for Translational Pathology, University of Michigan, Ann Arbor, Michigan, USA

# This author is now at the Clinical Research Division, Fred Hutchinson Cancer Center, Seattle, Washington, USA

### **\*Corresponding author:**

William E. Rainey, PhD

University of Michigan, Department of Molecular and Integrative Physiology

1150 West Medical Center Dr., 2558 Medical Science Research Building II, Ann Arbor, MI, 48109, USA

E mail: wer@med.umich.edu

## Supplemental methods

### Immunohistochemistry

IHC was performed using following primary antibodies as described previously<sup>1</sup>: CYP11B2 (Millipore, #MABS1251, mouse monoclonal, RRID: AB\_2650562) and CYP17A1 (LifeSpan Biosciences, #LS-B14227, rabbit polyclonal, RRID: AB\_2088387).

### Direct Sanger sequencing

Direct Sanger sequencing was performed on gDNA from FFPE as described previously<sup>2</sup>. Following primers for *CACNAIH* gene were used for PCR: forward 5'-GCCATAGATGACTGCAGTG-3'; reverse 5'-TGATGAAGAAGGCGCAGCAG-3'.

### Cell experimental protocols

For RNA analysis, cells were plated in triplicate in 48-well cell culture dishes at a density of  $0.1 \times 10^6$  cells per well in 1 mL per well. After 48 hours, the growth medium was replaced with 1 mL per well of low serum medium containing 0.1% Cosmic Calf Serum with or without 1  $\mu\text{g/mL}$  of doxycycline. After an additional 24 hours, the medium was replaced with fresh low serum medium with or without 1  $\mu\text{g/mL}$  of doxycycline. An agonist treatment with angiotensin II (10 nM) was also performed as a comparison. Cells were harvested after 24 hours of treatment for RNA analysis.

For steroid analysis, cells were plated in duplicate in 6-well cell culture dishes at a density of  $0.9 \times 10^6$  cells per well in 3 mL per well of growth medium. After 48 hours, the growth medium was replaced with low serum medium containing 0.1% Cosmic Calf Serum. After an additional 24 hours, the cell culture medium was replaced with 1.3 mL low serum medium with or without 1  $\mu\text{g/mL}$  of doxycycline. As a comparison, treatment with or without angiotensin II (100 nM) for each group was also performed. After 48 hours of treatment, cell culture media was collected and the cells were frozen for future protein extraction. Cell protein was extracted using mammalian protein extraction reagent and protein concentration was determined by the bicinchoninic acid protein assay.

### Quantitative real-time RT-PCR

Cell RNA isolation and cDNA generation were performed as described previously<sup>3</sup>. PCR was performed using ABI StepOnePlus Real-Time PCR systems (Applied Biosystems). Primer/probe mixture for the amplification of *CYP11B2* was prepared as previously described<sup>4</sup> and ones for *CACNAIH* (Hs01103527\_m1) and *PPIA* (Hs99999904\_m1) were purchased from Thermo Fischer Scientific. The *PPIA* transcript was used for sample loading normalization. To calculate relative mRNA expression, the delta-delta threshold cycle method was used<sup>5</sup>.

### Aldosterone quantification by LC-MS/MS

Aldosterone was quantified by liquid chromatography-tandem mass spectrometry (LC-MS/MS). Unlabeled and deuterium-labeled steroids were obtained from Cerilliant, and Sigma-Aldrich respectively (**Table S1**). 120  $\mu\text{L}$  of deuterated aldosterone internal standard of known concentration was combined with 1.3 mL of cell media, followed by addition of 1 mL of acetonitrile for deproteinization in a 5 mL tube. The suspension was vortexed for 5 minutes and centrifuged for 5 minutes at 3000 rpm. For extraction of aldosterone, the supernatant was mixed with 6 mL methyl-t-butyl ether (MTBE) and 1 mL water for 30 minutes. The MTBE phase was then collected and dried down. 1.5 mL ethyl acetate and 375  $\mu\text{L}$  of 10% sodium chloride was

added to the dried residue and suspension was again mixed for 10 minutes and then allowed to stand for 5 minutes. The organic phase was separated and evaporated under nitrogen. The dried residue of each sample was resuspended in 60  $\mu$ L methanol/deionized water (1:1), transferred to a 0.20 mL vial insert and stored at  $-20^{\circ}\text{C}$  until LC-MS/MS analysis.

Samples (20  $\mu$ L) were injected via autosampler and resolved with a pair of Agilent 1260/1290 binary pump HPLCs via 2D liquid chromatography, first on a 10 mm x 3 mm, 3  $\mu$ m particle size Hypersil Gold C4 loading column (Thermo Scientific, Waltham, Massachusetts) followed by a Kinetex 150 mm x 2.1 mm, 2.6  $\mu$ m particle size biphenyl resolving column (Phenomenex, Torrance, CA). The mobile phases consisted of 0.2 mmol/L aqueous ammonium fluoride (A) and methanol with 0.2 mmol/L ammonium fluoride (B). Aldosterone was eluted using gradient specifications as described in **Table S2**. The column effluent was directed into the source of an Agilent 6495 triple quadrupole mass spectrometer using electrospray ionization in positive ion mode. Quantitation was accomplished by comparing ion currents for the monitored ions with weighted (1/x) 10-point linear external calibration curves ( $r^2$  was  $>0.995$ ) and corrected for specimen concentration and recovery of internal standards using ChemStation and MassHunter software (Agilent, Santa Clara, CA). The lower limit of detection (signal-to-noise ratio of 3) and lower limit of quantitation (signal-to-noise ratio of 5) for aldosterone were 12 and 20 pg/mL respectively. The results were normalized to protein concentration and shown as fold change over basal.

## References

1. Nanba K, Chen AX, Omata K, Vinco M, Giordano TJ, Else T, Hammer GD, Tomlins SA and Rainey WE. Molecular Heterogeneity in Aldosterone-Producing Adenomas. *J Clin Endocrinol Metab.* 2016;101:999-1007.
2. Nanba K, Omata K, Tomlins SA, Giordano TJ, Hammer GD, Rainey WE and Else T. Double adrenocortical adenomas harboring independent KCNJ5 and PRKACA somatic mutations. *Eur J Endocrinol.* 2016;175:K1-6.
3. Nanba K, Chen AX, Turcu AF and Rainey WE. H295R expression of melanocortin 2 receptor accessory protein results in ACTH responsiveness. *J Mol Endocrinol.* 2016;56:69-76.
4. Pezzi V, Mathis JM, Rainey WE and Carr BR. Profiling transcript levels for steroidogenic enzymes in fetal tissues. *J Steroid Biochem Mol Biol.* 2003;87:181-9.
5. Livak KJ and Schmittgen TD. Analysis of relative gene expression data using real-time quantitative PCR and the 2<sup>(-Delta Delta C(T))</sup> Method. *Methods.* 2001;25:402-8.
6. Nanba K, Omata K, Else T, Beck PCC, Nanba AT, Turcu AF, Miller BS, Giordano TJ, Tomlins SA and Rainey WE. Targeted Molecular Characterization of Aldosterone-Producing Adenomas in White Americans. *J Clin Endocrinol Metab.* 2018;103:3869-3876.

**Table S1. Aldosterone measurement by LC-MS/MS**

| <b>Steroid</b> | <b>Steroid Manufacturer</b> | <b>Precursor/Product Ions (m/z<sup>a</sup>)</b> | <b>RT (min)</b> | <b>Internal standard</b>   | <b>Internal standard Manufacturer</b> |
|----------------|-----------------------------|-------------------------------------------------|-----------------|----------------------------|---------------------------------------|
| Aldosterone    | Cerilliant                  | 361.2/ 315.1                                    | 9.8             | Aldosterone-d <sub>7</sub> | Sigma-Aldrich                         |

<sup>a</sup>m/z, mass to charge ratio; RT, retention time

**Table S2: Gradient specifications of the Agilent 1260/1290 two dimensional liquid chromatography system**

**(A) 1260 HPLC Pump - C4 loading column**

Mobile Phase A: 0.2 mmol/L Ammonium fluoride (NH<sub>4</sub>F)

Mobile Phase B: Methanol + 0.2 mmol/L NH<sub>4</sub>F

| Time (min) | A (%) | B (%) | Flow (mL/min) | Pressure (bar) |
|------------|-------|-------|---------------|----------------|
| 0.00       | 65    | 35    | 0.20          | 400            |
| 0.80       | 65    | 35    | 0.20          | 400            |
| 0.85       | 0     | 100   | 0.20          | 400            |
| 1.20       | 0     | 100   | 0.20          | 400            |
| 6.00       | 0     | 100   | 0.20          | 400            |
| 6.10       | 65    | 35    | 0.20          | 400            |

**(B) 1290 HPLC Pump - Biphenyl resolution column**

Mobile Phase A: 0.2 mmol/L Ammonium fluoride (NH<sub>4</sub>F)

Mobile Phase B: Methanol + 0.2 mmol/L NH<sub>4</sub>F

| Time (min) | A (%) | B (%) | Flow (mL/min) | Pressure (bar) |
|------------|-------|-------|---------------|----------------|
| 0.00       | 65    | 35    | 0.20          | 800            |
| 0.50       | 65    | 35    | 0.20          | 450            |
| 2.00       | 65    | 35    | 0.20          | 450            |
| 2.01       | 40    | 60    | 0.20          | 500            |
| 5.00       | 40    | 60    | 0.20          | 500            |
| 5.01       | 40    | 60    | 0.15          | 500            |
| 10.20      | 11    | 89    | 0.15          | 500            |
| 10.40      | 11    | 89    | 0.15          | 500            |
| 10.41      | 0     | 100   | 0.50          | 800            |
| 11.20      | 0     | 100   | 0.50          | 800            |
| 11.21      | 65    | 35    | 0.50          | 800            |
| 13.20      | 65    | 35    | 0.50          | 800            |

**Table S3. Prevalence of somatic mutations in APAs from white patients**

| <b>Affected gene</b> | <b>APAs from men</b> | <b>APAs from women</b> | <b>Total</b> |
|----------------------|----------------------|------------------------|--------------|
| <i>KCNJ5</i>         | 11 (24%)             | 21 (70%)               | 32 (43%)     |
| <i>ATP1A1</i>        | 10 (22%)             | 3 (10%)                | 13 (17%)     |
| <i>ATP2B3</i>        | 3 (7%)               | 0                      | 3 (4%)       |
| <i>CACNA1D</i>       | 15 (33%)             | 1 (3%)                 | 16 (21%)     |
| <i>CACNA1H</i>       | 2 (4%)               | 1 (3%)                 | 3 (4%)       |
| <i>CTNNB1</i>        | 0                    | 2 (7%)                 | 2 (3%)       |
| Mutation negative    | 4 (9%)               | 2 (7%)                 | 6 (8%)       |
| Total                | 45                   | 30                     | 75           |

Determination of *CACNA1H* mutation prevalence includes tumor samples analyzed in our previous publication<sup>6</sup>.

**Table S4. Clinical characteristics of patients with *CACNA1H*-mutated APA**

| Age | Sex    | Race  | NGS ID of APA | BP (mmHg) | Number of anti-hypertensive medication | Serum potassium (mEq/L) | Potassium supplementation | PAC (ng/dL) | PRA (ng/mL/h) | Tumor size on imaging study (mm) | Side of adrenal tumor | Side of aldosterone excess by AVS |
|-----|--------|-------|---------------|-----------|----------------------------------------|-------------------------|---------------------------|-------------|---------------|----------------------------------|-----------------------|-----------------------------------|
| 40* | Female | White | APA3          | 148/102   | 6                                      | 3.4                     | No                        | 27          | 0.1           | 23                               | Left                  | not done                          |
| 56  | Male   | White | APA_UM60      | 130/80    | 4                                      | not available           | Yes                       | 20.9        | 0.15          | not detected                     | -                     | Left                              |
| 48  | Male   | White | APA_UM90      | 151/91    | 7                                      | 3.7                     | No                        | 87.9        | <0.1          | 25                               | Left                  | Left                              |

BP, blood pressure; AVS, adrenal venous sampling.

\*, This case was described as Case 5 in our previous study<sup>1</sup>.



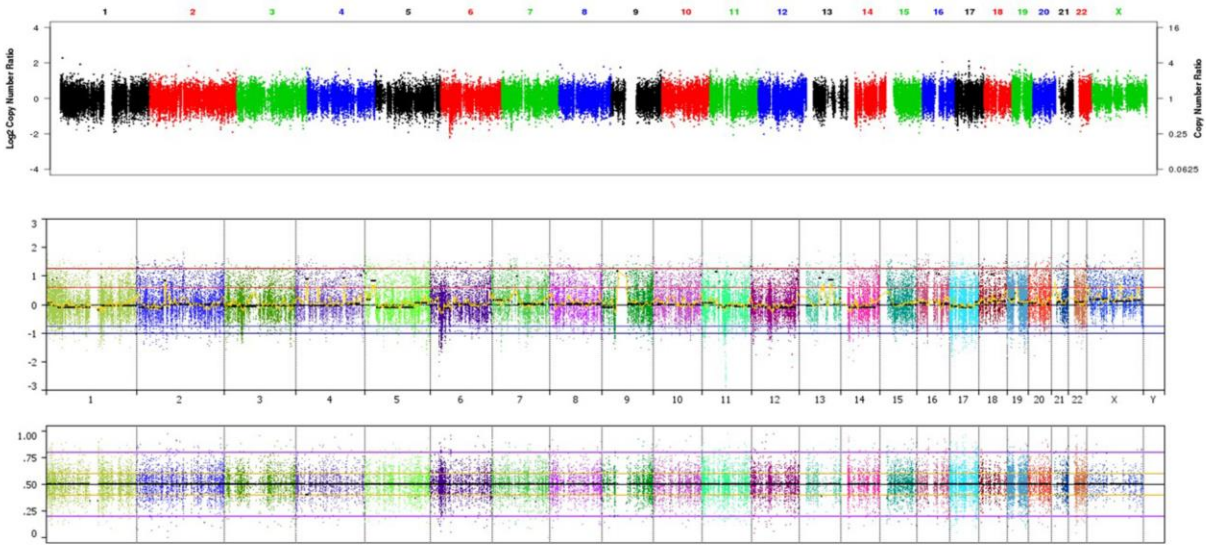

**Figure S1. Copy number plot of the APA sample harboring *CACNA1H* mutation.** X-axis represents chromosomal loci linearly arranged from chr1 to 23 followed by chrX (colored for easy visualization); the y-axis represents copy number level measured as ratio of APA tissue versus patient matched normal adjacent tissue (Log2 ratio on the left axis, and linear ratio on the right axis).

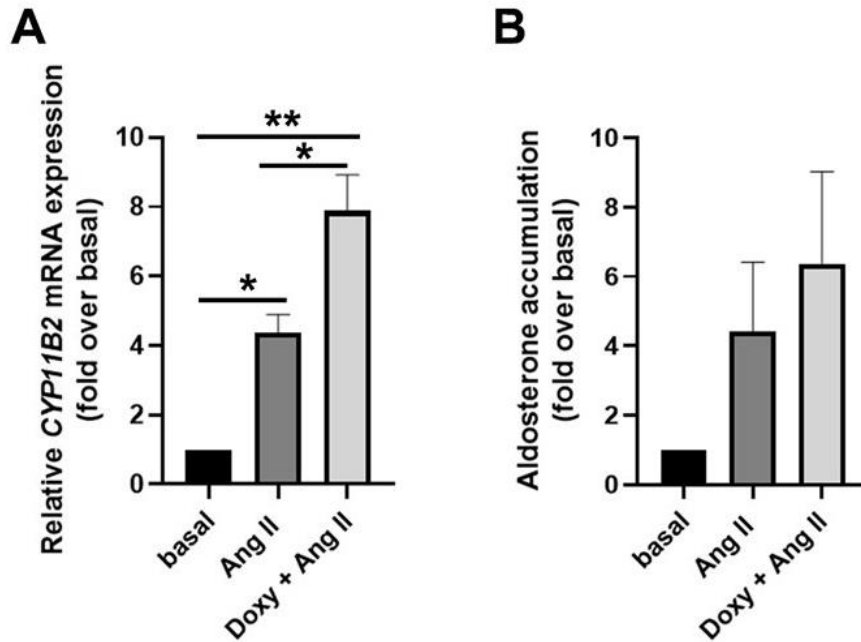

**Figure S2. Effect of angiotensin II (AngII) on *CACNA1H*<sup>I1430T</sup> induced HAC15 cells**

**A.** Relative *CYP11B2* transcript levels in basal (untreated) cells and cells treated with AngII (10 nM) alone or with AngII plus doxycycline (Doxy) (1  $\mu$ g/mL). **B.** Relative aldosterone production in basal (untreated) cells and cells treated with AngII (100 nM) alone or along with doxycycline (1  $\mu$ g/mL). *CACNA1H*<sup>I1430T</sup> enhanced AngII stimulated *CYP11B2* expression. However, the trend for *CACNA1H*<sup>I1430T</sup> enhanced AngII aldosterone production did not reach statistical significance due to a large variation of the independent cell-based experiments. Experimental data represent a minimum of three independent experiments. Statistical analyses were performed using one-way ANOVA followed by Turkey's multiple comparison test. \* $P < 0.05$ , \*\* $P < 0.001$ .
